# Supplementary material for: Efficient optical limiting of polypyrrole ternary nanohybrids co-functionalized with peripherally substituted porphyrins and axially coordinated metal-porphyrins
Source: Royal Society of Chemistry journal article supplement (doi:10.1039/c9dt02716e), 2019-01-01
Supplement: c9dt02716e1.pdf [file c9dt02716e1.pdf]

## Electronic Supplementary Material

### Efficient optical limiting of polypyrrole ternary nanohybrids co-functionalized with peripherally substituted porphyrins and axially-coordinated metal-porphyrins

Aijian Wang\*, Laixiang Cheng, Xiaodong Chen, Cheng Li, Jing Zhang, Weihua Zhu\*

School of Chemistry & Chemical Engineering, Jiangsu University, Zhenjiang 212013, P.R. China

Corresponding Author. E-mail: [wajujs@ujs.edu.cn](mailto:wajujs@ujs.edu.cn), [sayman@ujs.edu.cn](mailto:sayman@ujs.edu.cn)

Table S1. Surface element compositions (atomic percentage) of PPy, TPP-PPy, SnTPP-PPy and

TPP-PPy-SnTPP derived from the XPS results.

| Elements | PPy    | TPP-PPy | SnTPP-PPy | TPP-PPy-SnTPP |
|----------|--------|---------|-----------|---------------|
| C        | 69.16% | 72.19%  | 73.36%    | 74.94%        |
| N        | 14.64% | 12.25%  | 10.63%    | 9.95%         |
| O        | 16.20% | 15.56%  | 14.70%    | 14.15%        |
| Sn       | 0      | 0       | 1.31%     | 0.96%         |

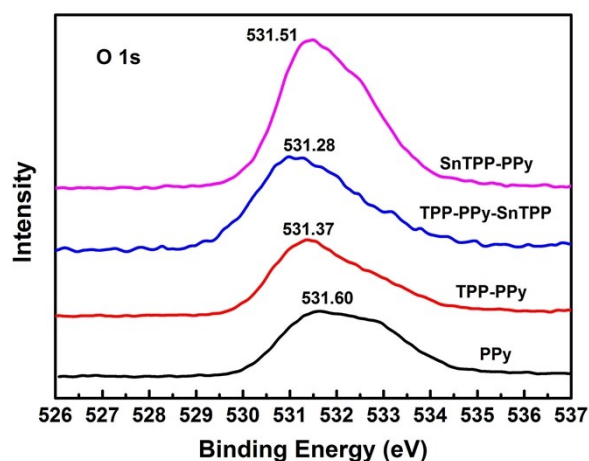

Figure S1. XPS spectra of PPy, SnTPP-PPy, TPP-PPy and TPP-PPy-SnTPP in the region of O 1s.

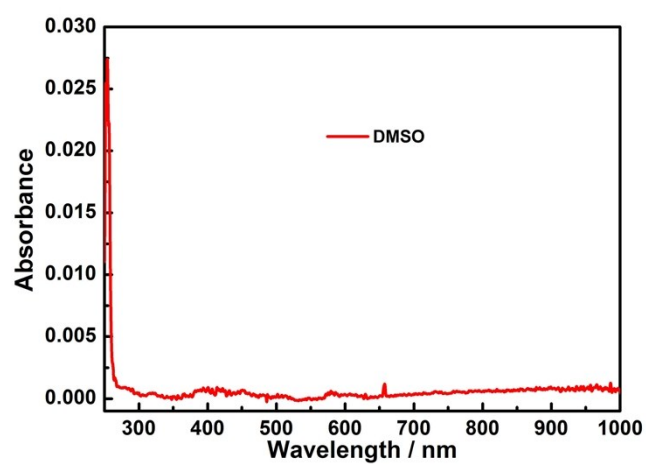

Figure S2. UV-visible absorption spectrum of DMSO used for the Z-scan measurements.

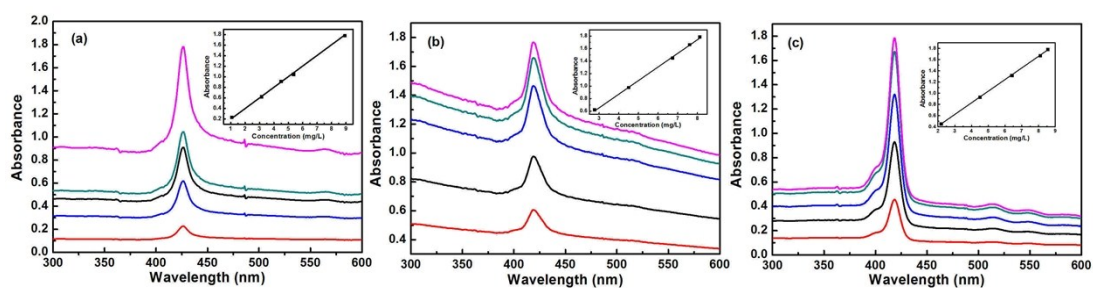

Figure S3. Concentration dependence of the UV-vis absorption spectra of (a) TPP-PPy, (b) SnTPP-PPy and (c) TPP-PPy-SnTPP in DMSO.
